# Supplementary material for: Parental Emotional Availability and Family Functioning in Adolescent Anorexia Nervosa Subtypes
Source: MDPI journal article supplement (doi:10.3390/ijerph20010068), 2022-12-21
Supplement: s1 [file s1]

**Table S1. Raw scores of FACES-IV scales**

|        | Cohesion<br>(SD) | Flexibility<br>(SD) | Disengaged<br>(SD) | Enmeshed<br>(SD) | Rigid<br>(SD) | Chaotic<br>(SD) | Communication<br>(SD) | Satisfaction<br>(SD) |
|--------|------------------|---------------------|--------------------|------------------|---------------|-----------------|-----------------------|----------------------|
| AN-R   | 26.9 (4.8)       | 25.1 (4.4)          | 15 (3.9)           | 14.4 (5.3)       | 19.1<br>(4)   | 16.8<br>(4.5)   | 35 (7.6)              | 45 (22.7)            |
| AN-B/P | 25.7 (5.3)       | 23.7 (5.4)          | 17 (5.1)           | 15.6 (4.1)       | 18.5<br>(4)   | 18.5 (4)        | 33.9 (7.6)            | 43.2 (25.4)          |

AN-R, restrictive anorexia nervosa; AN-B/P, binge-purge anorexia nervosa
